# Supplementary material for: Crystal structures and identification of novel Cd2+-specific DNA aptamer
Source: PubMed Central journal article supplement (PMC10201416; doi:10.1093/nar/gkad239), 2023-04-04
Supplement: gkad239_supplemental_file.pdf [file gkad239_supplemental_file.pdf]

# *Supporting Information*

**For**

## **Crystal structures and identification of novel Cd<sup>2+</sup>-specific DNA aptamer**

Hehua Liu<sup>1,#</sup>, Yanqing Gao<sup>1,#</sup>, Johnsi Mathivanan<sup>2,#</sup>, Zev Armour-Garb<sup>2</sup>, Zhiwei Shao<sup>1</sup>, Yixi Zhang<sup>1</sup>, Xin Zhao<sup>1</sup>, Qiyuan Shao<sup>1</sup>, Weizhen Zhang<sup>1</sup>, Jie Yang<sup>1</sup>, Chulei Cao<sup>1</sup>, Huili Li<sup>1</sup>, Jia Sheng<sup>2,\*</sup>, Jianhua Gan<sup>1,\*</sup>

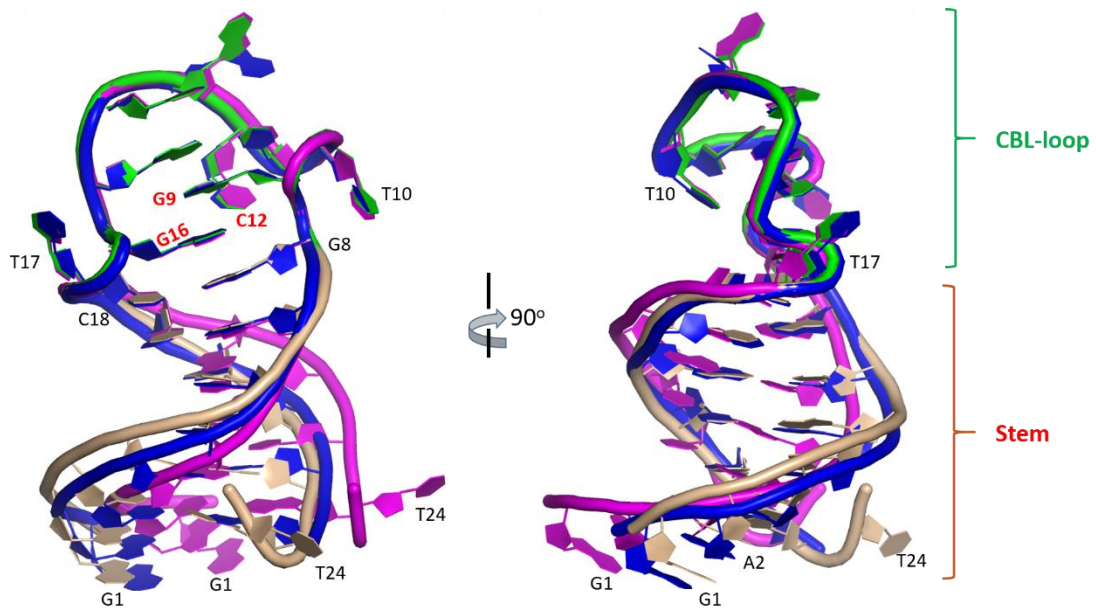

**Supplementary Figure S1.** Superposition of the three DNA1-Cd<sup>2+</sup> complexes in the native DNA1 structure. The CBL-loop and the stem in complex A are colored in green and wheat, respectively. Both the CBL-loop and the stem are colored magenta in complex B and blue in complex C.

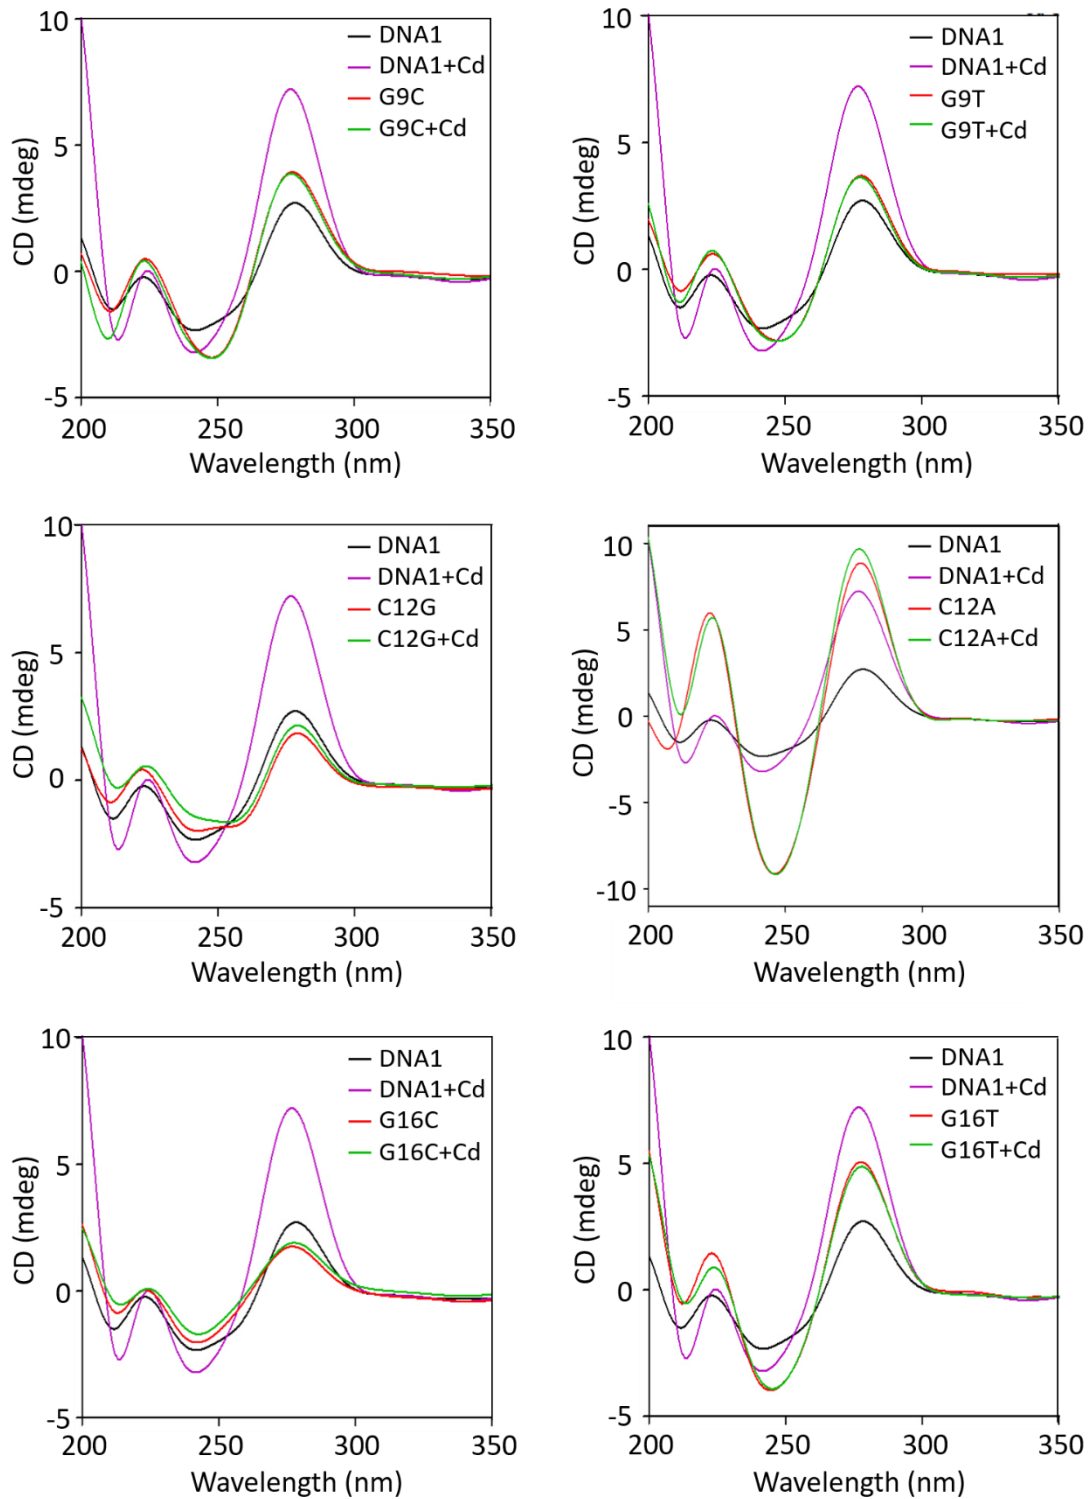

**Supplementary Figure S2.** Comparison of the CD spectra of the native DNA1 and variants with G9, C12 or G16 mutated.

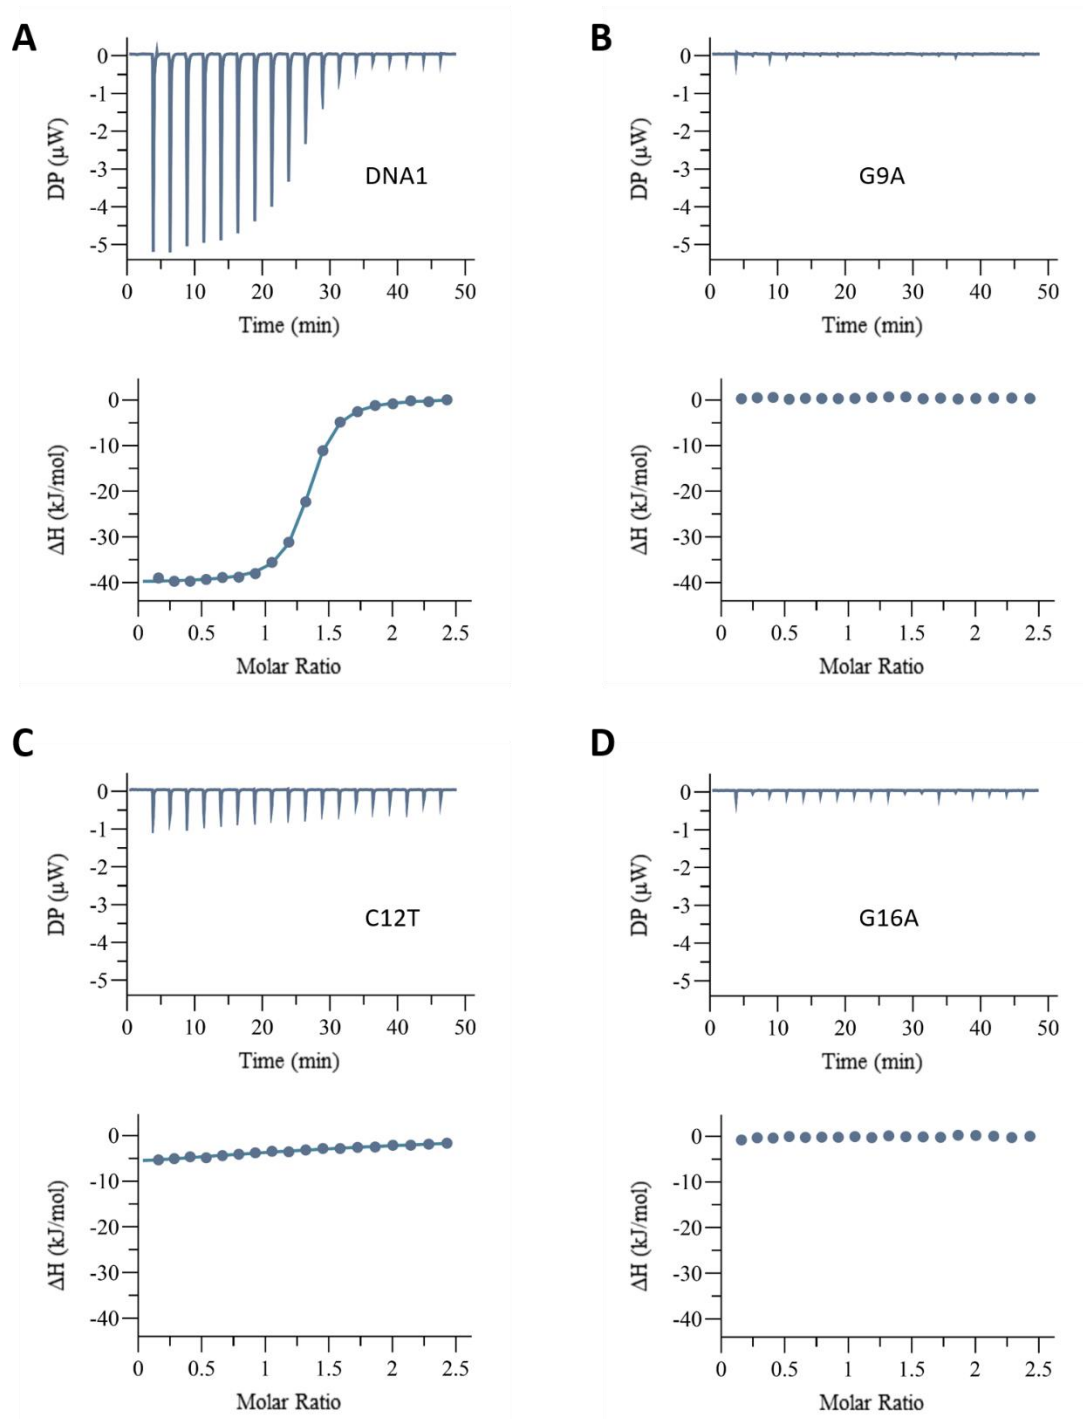

**Supplementary Figure S3.** ITC analysis showing  $\text{Cd}^{2+}$  binding by (A) the native DNA1, (B) the G9A variant, (C) the C12T variant and (D) the G16A variant, respectively.

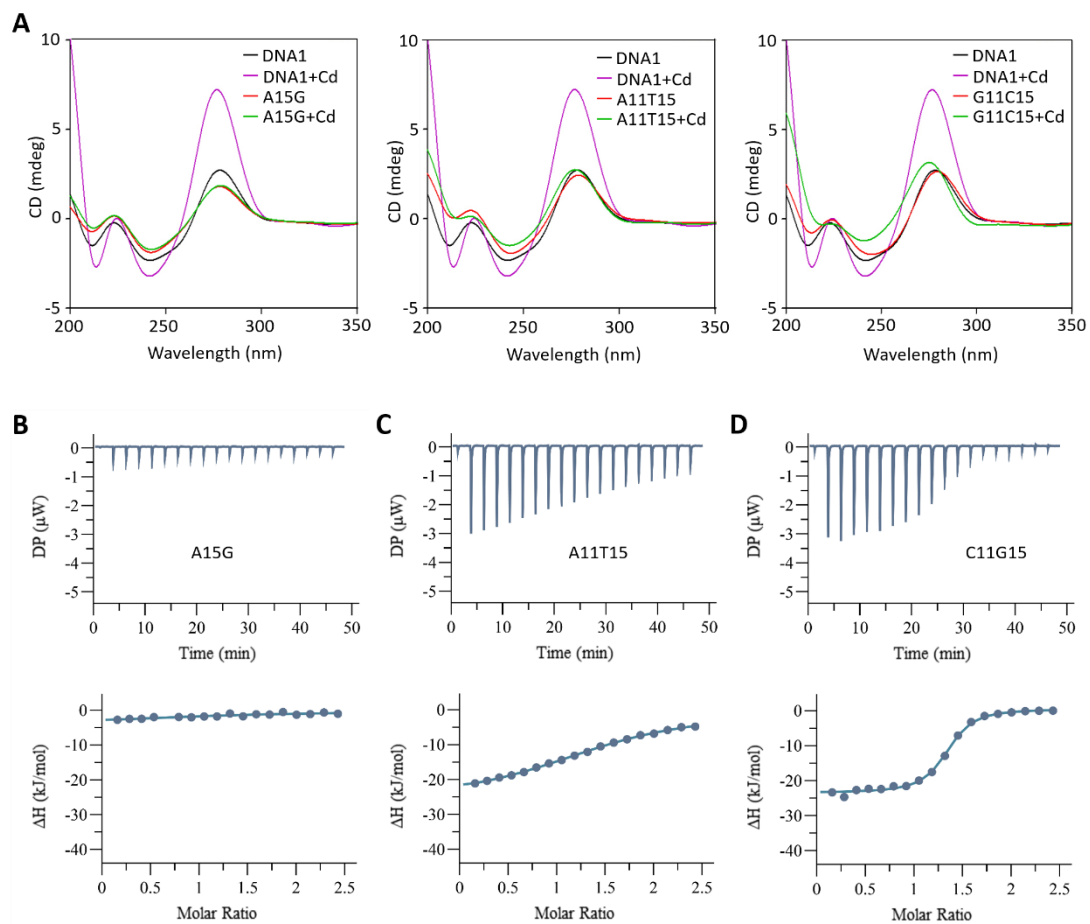

**Supplementary Figure S4.** (A) Comparison of the CD spectra of the native DNA1, the A15G, A11T15 and G11C15 variants. (B-D) ITC analysis showing Cd<sup>2+</sup> binding by the A15G, A11T15 and C11G15 variants, respectively.

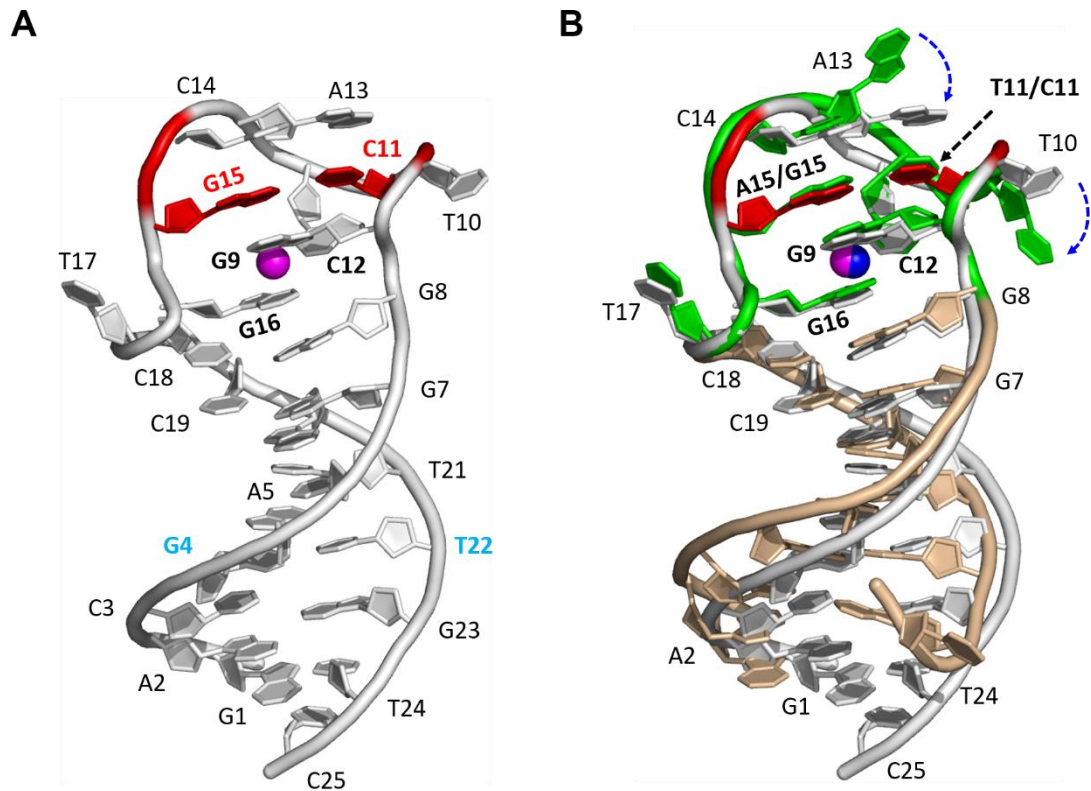

**Supplementary Figure S5.** (A) The overall structure of the C11G15-Cd<sup>2+</sup> complex. (B) Superposition of the native DNA1-Cd<sup>2+</sup> and the C11G15-Cd<sup>2+</sup> complex structures. The CBL-loop, stem and Cd<sup>2+</sup> are colored green, wheat and blue in the native DNA1-Cd<sup>2+</sup> structure, respectively.

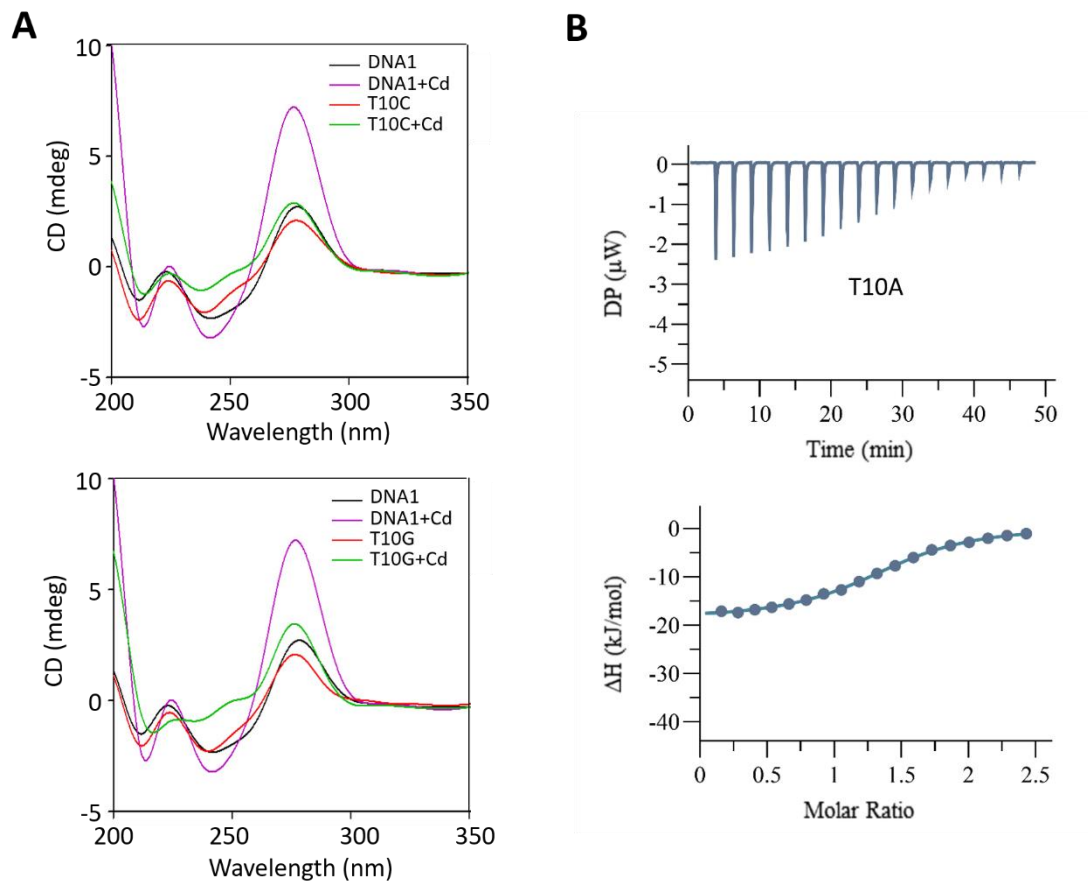

**Supplementary Figure S6.** (A) Comparison of the CD spectra of the native DNA1 and the T10C and T10G variants. (B) ITC analysis showing  $\text{Cd}^{2+}$  binding by the T10A variant.

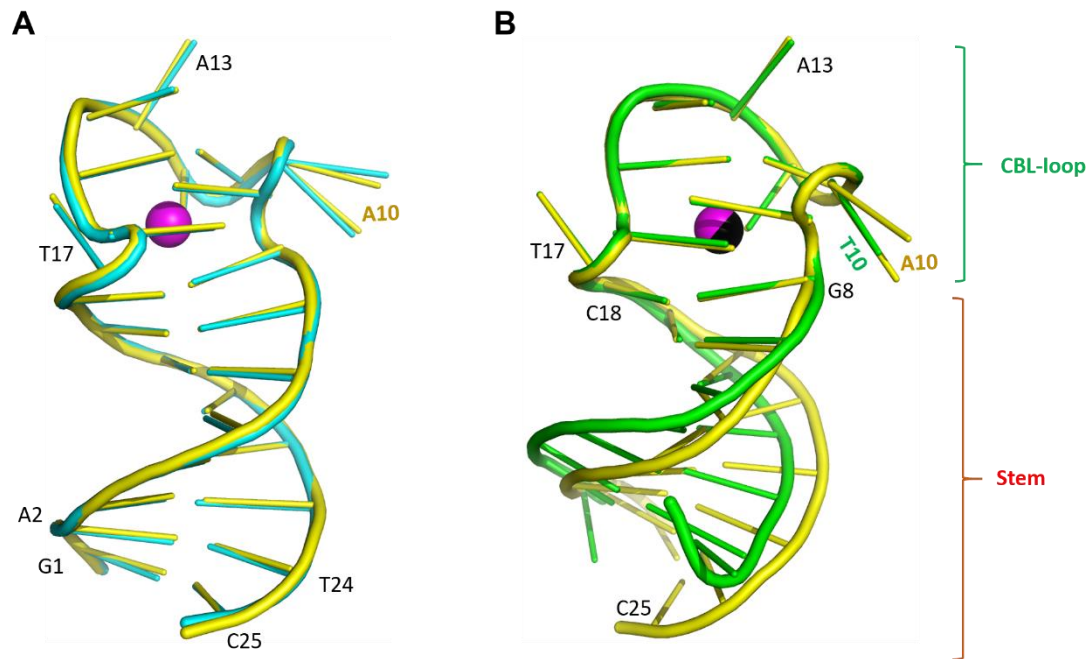

**Supplementary Figure S7.** (A) Superposition of the two T10A-Cd<sup>2+</sup> complexes in the T10A-Cd<sup>2+</sup> structure. (B) Superposition of the native DNA1-Cd<sup>2+</sup> (green and black) and the T10A-Cd<sup>2+</sup> (yellow and magenta) complexes.



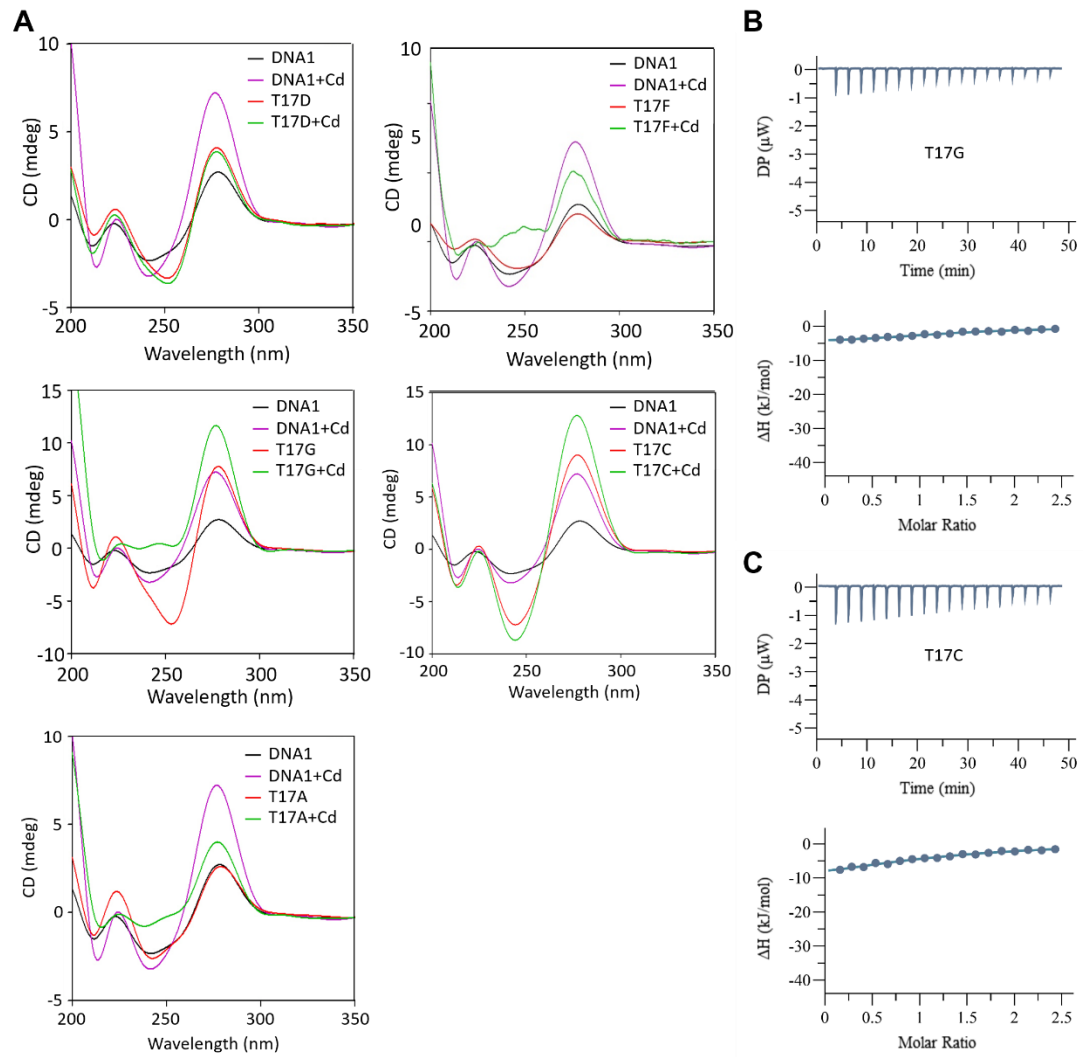

**Supplementary Figure S8.** (A) Comparison of the CD spectra of the native DNA1 and variants with T17 deleted or mutated. (B-C) ITC analysis showing Cd<sup>2+</sup> binding by the T17G and T17C variants, respectively.

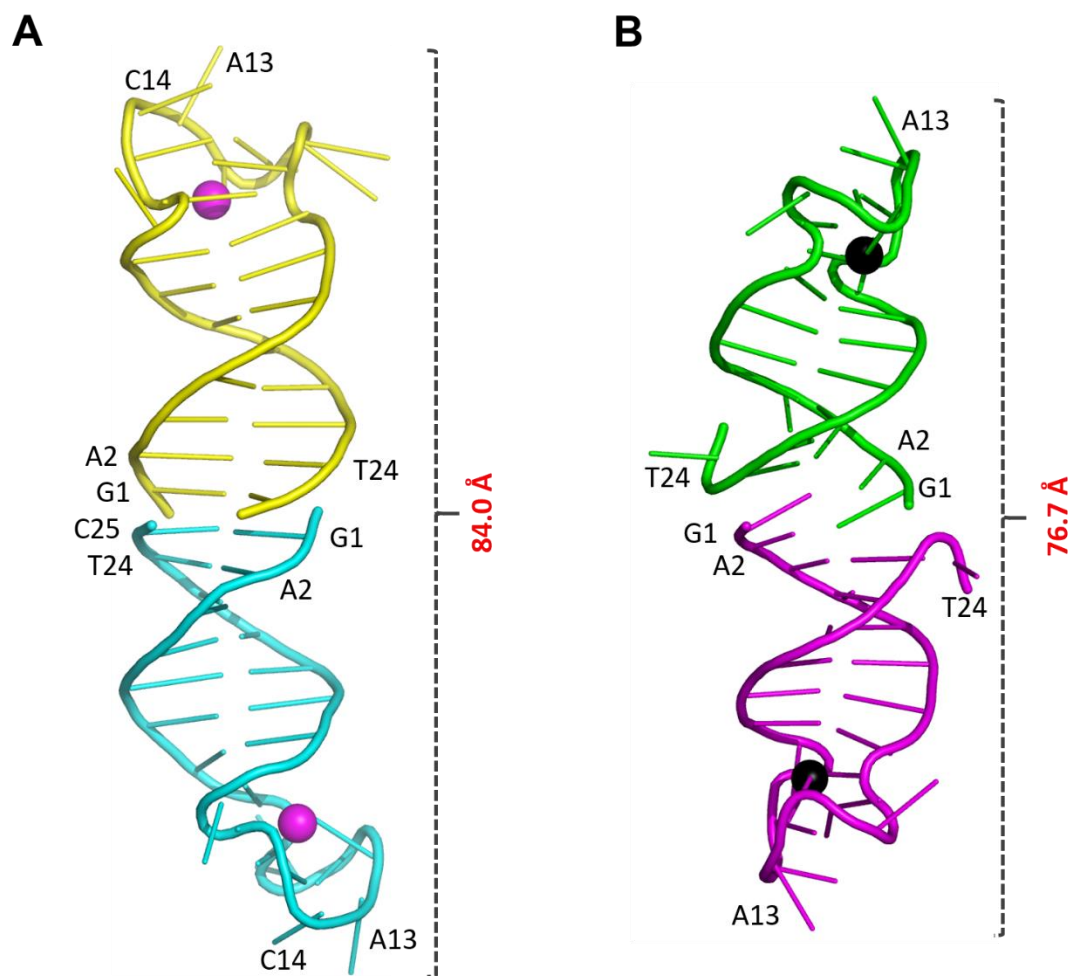

**Supplementary Figure S9.** (A) Stacking of two T10A molecules in the crystal lattice of the T10A-Cd<sup>2+</sup> structure. (B) Stacking of two DNA1 molecules in the crystal lattice of the native DNA1-Cd<sup>2+</sup> structure.

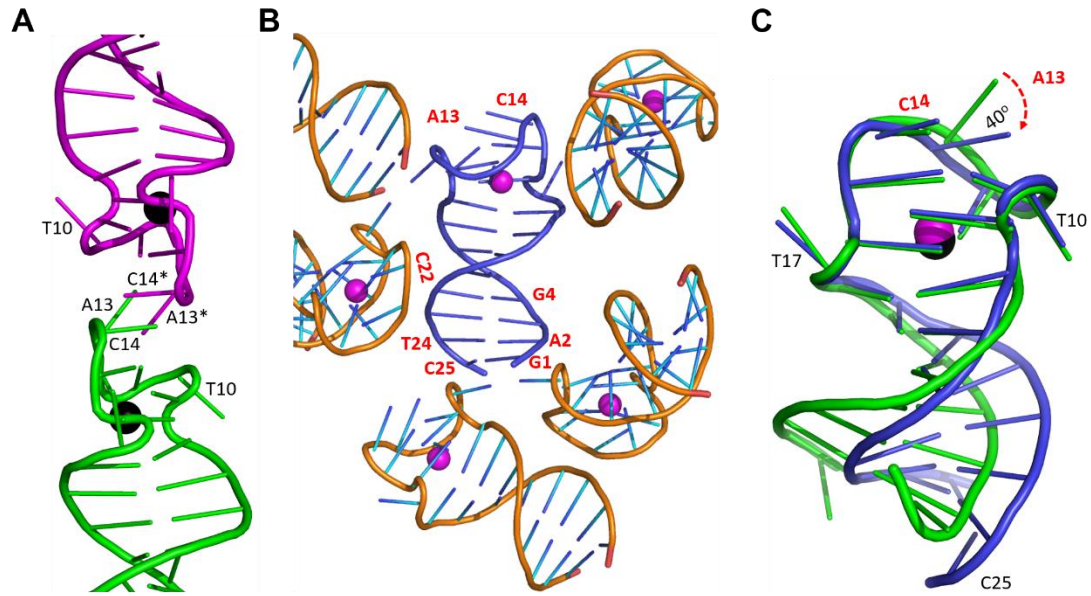

**Supplementary Figure S10.** (A) Stacking of two DNA1 molecules in the crystal lattice of the native DNA1-Cd<sup>2+</sup> structure. (B) Packing of the T22C variant in the crystal lattice of the T22C-Cd<sup>2+</sup> structure. (C) Superposition of the CBL-loops in the native DNA1-Cd<sup>2+</sup> and the T22C-Cd<sup>2+</sup> complex structures, which are colored green and blue, respectively.

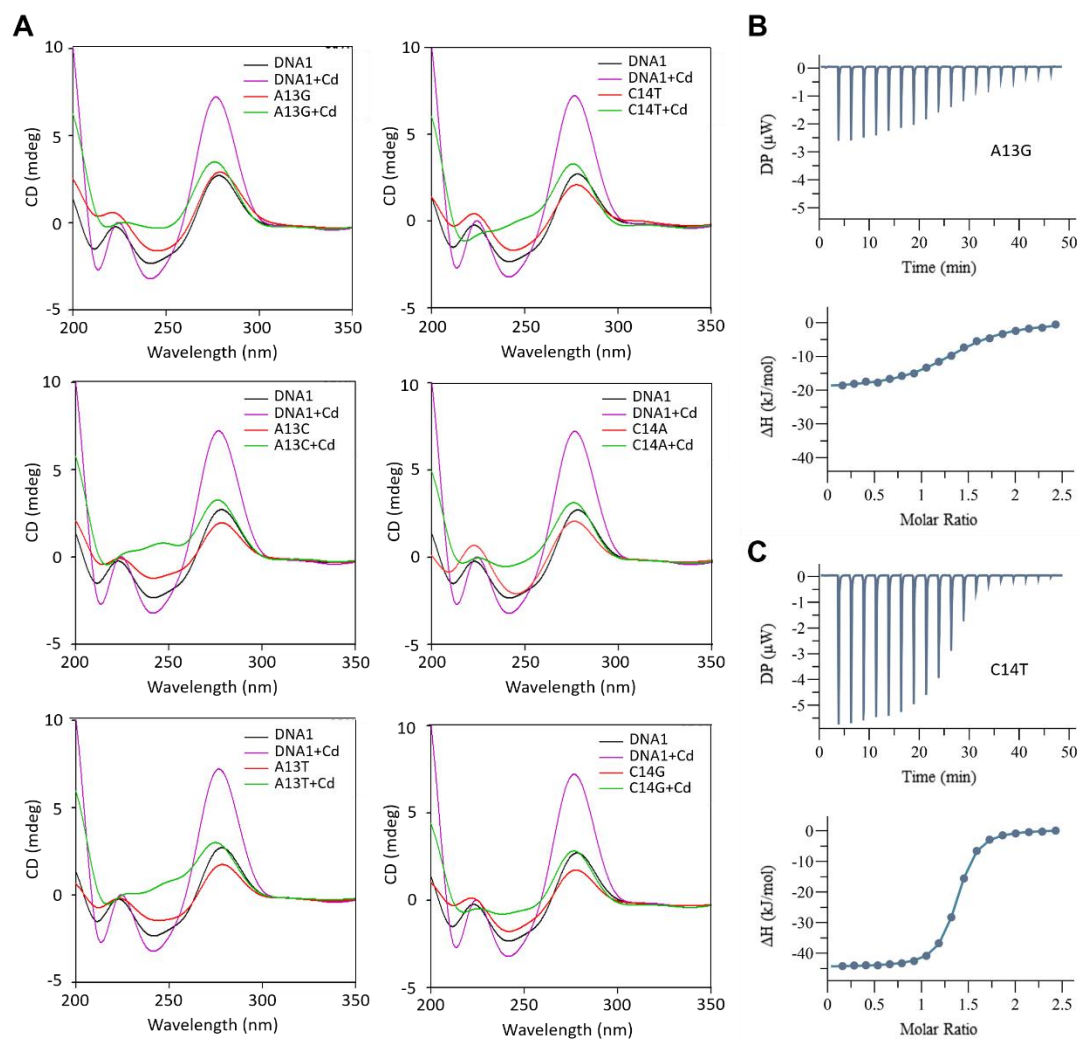

**Supplementary Figure S11. Supplementary Figure S8. (A)** Comparison of the CD spectra of the native DNA1 and variants with either A13 or C14 mutated. **(B-C)** ITC analysis showing Cd<sup>2+</sup> binding by the A13G and C14T variants, respectively.

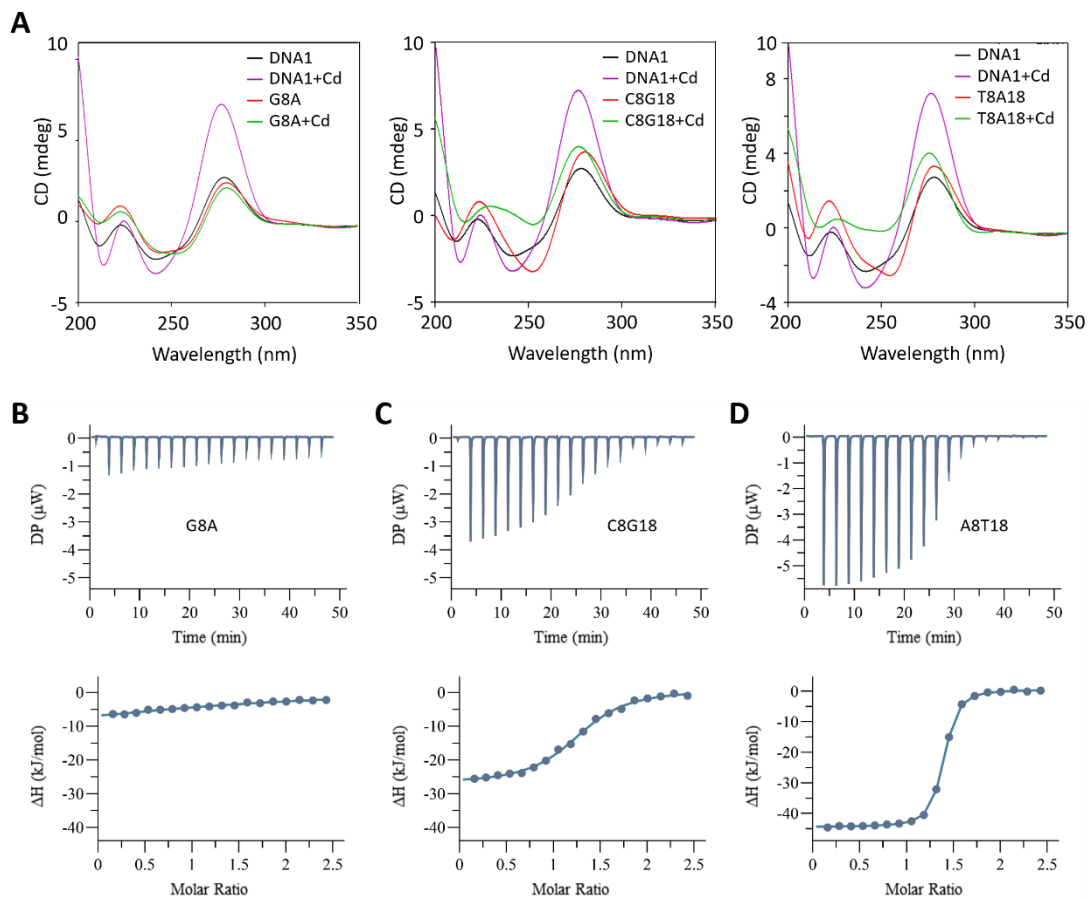

**Supplementary Figure S12.** (A) Comparison of the CD spectra of the native DNA1, the G8A, C8G18 and T8A18 variants. (B-D) ITC analysis showing Cd<sup>2+</sup> binding by the G8A, C8G18 and A8T18 variants, respectively.

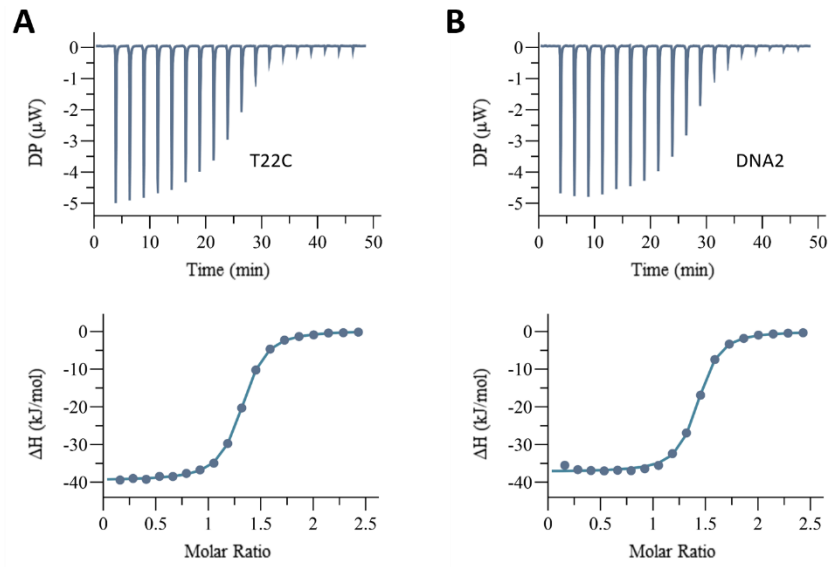

**Supplementary Figure S13.** ITC analysis showing  $\text{Cd}^{2+}$  binding by (A) the T22C variant and (B) DNA2, respectively.

**Supplementary Table S1: The detailed sequence of DNA1 and variants.**

| Name   | Sequence (5'-3')                             |
|--------|----------------------------------------------|
| DNA1   | GACGACGGGTTACAGTCCGTTGTC                     |
| G8A    | GACGACG <b>A</b> GTTACAGTCCGTTGTC            |
| C8G18  | GACGACG <b>C</b> GTTACAGT <b>G</b> CGTTGTC   |
| A8T18  | GACGACG <b>A</b> GTTACAGT <b>T</b> CGTTGTC   |
| T8A18  | GACGACG <b>T</b> GTTACAGT <b>A</b> CGTTGTC   |
| G9A    | GACGACGG <b>A</b> TTCACAGTCCGTTGTC           |
| G9T    | GACGACGG <b>T</b> TTCACAGTCCGTTGTC           |
| G9C    | GACGACGG <b>C</b> TTCACAGTCCGTTGTC           |
| T10D   | GACGACGGG-TCACAGTCCGTTGTC                    |
| T10F   | GACGACGGG <b>F</b> TCACAGTCCGTTGTC           |
| T10A   | GACGACGGG <b>A</b> TCACAGTCCGTTGTC           |
| T10G   | GACGACGGG <b>G</b> TCACAGTCCGTTGTC           |
| T10C   | GACGACGGG <b>C</b> TCACAGTCCGTTGTC           |
| C11G15 | GACGACGGGT <b>C</b> CAC <b>G</b> TCCGTTGTC   |
| G11C15 | GACGACGGGT <b>G</b> CAC <b>C</b> GTTCCGTTGTC |
| A11T15 | GACGACGGGT <b>A</b> CAC <b>T</b> GTCCGTTGTC  |
| C12G   | GACGACGGGTT <b>G</b> ACAGTCCGTTGTC           |
| C12A   | GACGACGGGTT <b>A</b> ACAGTCCGTTGTC           |
| C12T   | GACGACGGGTT <b>T</b> ACAGTCCGTTGTC           |
| A13T   | GACGACGGGTT <b>C</b> TAGTCCGTTGTC            |
| A13G   | GACGACGGGTT <b>G</b> CAGTCCGTTGTC            |
| A13C   | GACGACGGGTT <b>C</b> CAGTCCGTTGTC            |
| C14G   | GACGACGGGTTCA <b>G</b> AGTCCGTTGTC           |
| C14A   | GACGACGGGTTCA <b>A</b> AGTCCGTTGTC           |
| C14T   | GACGACGGGTTCA <b>T</b> AGTCCGTTGTC           |
| A15G   | GACGACGGGTTCAC <b>G</b> GTCCGTTGTC           |
| G16C   | GACGACGGGTTCAC <b>C</b> TCCGTTGTC            |
| G16A   | GACGACGGGTTCAC <b>A</b> TCCGTTGTC            |
| G16T   | GACGACGGGTTCAC <b>T</b> TCCGTTGTC            |
| T17D   | GACGACGGGTTACAG-CCGTTGTC                     |
| T17F   | GACGACGGGTTACAG <b>F</b> CCGTTGTC            |
| T17A   | GACGACGGGTTACAG <b>A</b> CCGTTGTC            |
| T17G   | GACGACGGGTTACAG <b>G</b> CCGTTGTC            |
| T17C   | GACGACGGGTTACAG <b>C</b> CCGTTGTC            |
| T22C   | GCCGACGGGTTACAGTCCGT <b>C</b> GGC            |
| DNA2   | --CGACGGGTTACAGTCCGT <b>C</b> G--            |

(The T10 and T17 nucleotides of DNA1 were substituted by an abasic site in the T10F and T17F variants, respectively)

**Supplementary Table S2: Sample compositions and crystallization conditions.**

| Structure               | Sample composition                     | Crystallization condition                                                                                          |
|-------------------------|----------------------------------------|--------------------------------------------------------------------------------------------------------------------|
| DNA1-Cd <sup>2+</sup>   | 1.0 mM DNA1<br>10 mM CdCl <sub>2</sub> | 10% v/v MPD<br>40 mM Sodium cacodylate pH 6.0<br>12 mM Spermine tetra-HCl<br>80 mM KCl<br>20 mM BaCl <sub>2</sub>  |
| T10A-Cd <sup>2+</sup>   | 1.0 mM DNA1<br>10 mM CdCl <sub>2</sub> | 10% v/v MPD<br>40 mM Sodium cacodylate pH 7.0<br>12 mM Spermine tetra-HCl<br>80 mM KCl<br>20 mM BaCl <sub>2</sub>  |
| C11G15-Cd <sup>2+</sup> | 1.0 mM DNA1<br>10 mM CdCl <sub>2</sub> | 45% v/v MPD<br>40 mM Sodium cacodylate pH 6.0<br>12 mM Spermine tetra-HCl<br>80 mM NaCl<br>20 mM BaCl <sub>2</sub> |
| T22C-Cd <sup>2+</sup>   | 1.0 mM DNA1<br>10 mM CdCl <sub>2</sub> | 10% v/v MPD<br>40 mM Sodium cacodylate pH 6.0<br>12 mM Spermine tetra-HCl<br>80 mM NaCl<br>20 mM BaCl <sub>2</sub> |
